# Supplementary material
Source: publisher site journal article supplement (https://e-cmh.org/upload/media/cmh-2023-0194-Supplementary-Fig-1.pdf)
Supplement: Supplementary file 1 [file cmh-2023-0194-Supplementary-Fig-1.pdf]

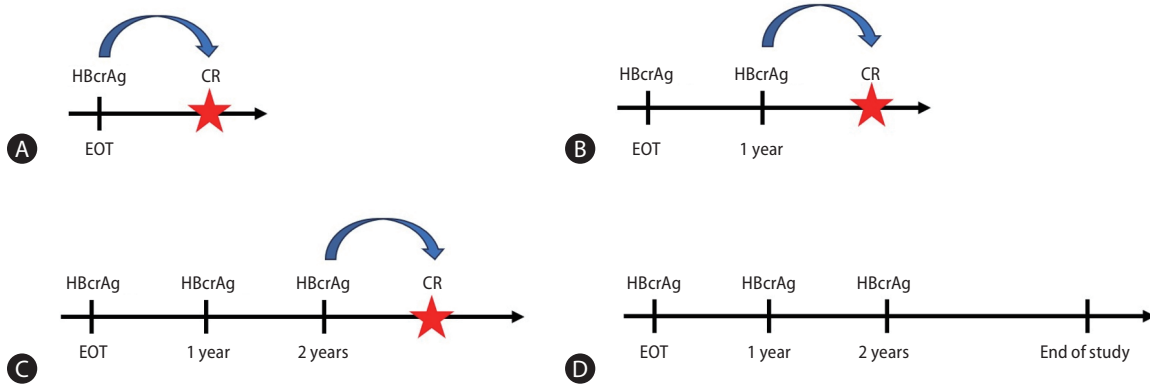

**Supplementary Figure 1.** The different patterns of the temporal relationship between repeated measurement of serum hepatitis B core-related antigen (HBcrAg) and clinical relapse (CR). (A) End of treatment HBcrAg level predicted CR within one year. (B) HBcrAg level at one year predicted CR between one and two years. (C) HBcrAg level at two year predicted CR after two years. (D) CR did not happen during the period of study.
